# Supplementary material
Source: PubMed Central journal article supplement (PMC2930708)
Supplement: supp_M109.071126_jbc.M109.071126-1.pdf [file supp_M109.071126_jbc.M109.071126-1.pdf]

**LOCALIZATION AND FUNCTION OF THE MEMBRANE-BOUND RIBOFLAVIN IN THE Na<sup>+</sup> TRANSLOCATING NADH:QUINONE OXIDOREDUCTASE (Na<sup>+</sup>-NQR) FROM *VIBRIO CHOLERAE* \***

**Marco S. Casutt<sup>1</sup>, Tamara Huber<sup>1</sup>, René Brunisholz<sup>2</sup>, Minli Tao<sup>1</sup>, Günter Fritz<sup>3</sup>, Julia Steuber<sup>1\*</sup>**

Department of Biochemistry<sup>1</sup>, University of Zurich, and Functional Genomics Centre Zurich<sup>2</sup>, Winterthurerstrasse 190, 8057 Zurich, Switzerland. Department of Neuropathology<sup>3</sup>, Breisacherstrasse 64, University of Freiburg, 79106 Freiburg, Germany

**Fig. S1.** Sequence alignment of non-redundant NqrB homologues. NqrB-related proteins from 69 organisms were retrieved from the UniProt knowledge base. Multiple sequence alignment was performed using the ClustalW algorithm (1) implemented in the BioEdit Sequence Alignment Editor (Version 7.0.9.0, (2)) with default settings. Identical residues and similar residues (BLOSUM62 scoring matrix) are underlaid with black and grey bars, respectively, and were identified with the BioEdit program using an identity and similarity threshold of 85% and the BLOSUM62 scoring matrix (3). Black bars indicate transmembrane helices, grey bars indicate hydrophobic stretches, as predicted from a consensus model based on 11 different topology prediction algorithms (see Materials and Methods and supplementary Table Fig. S2).

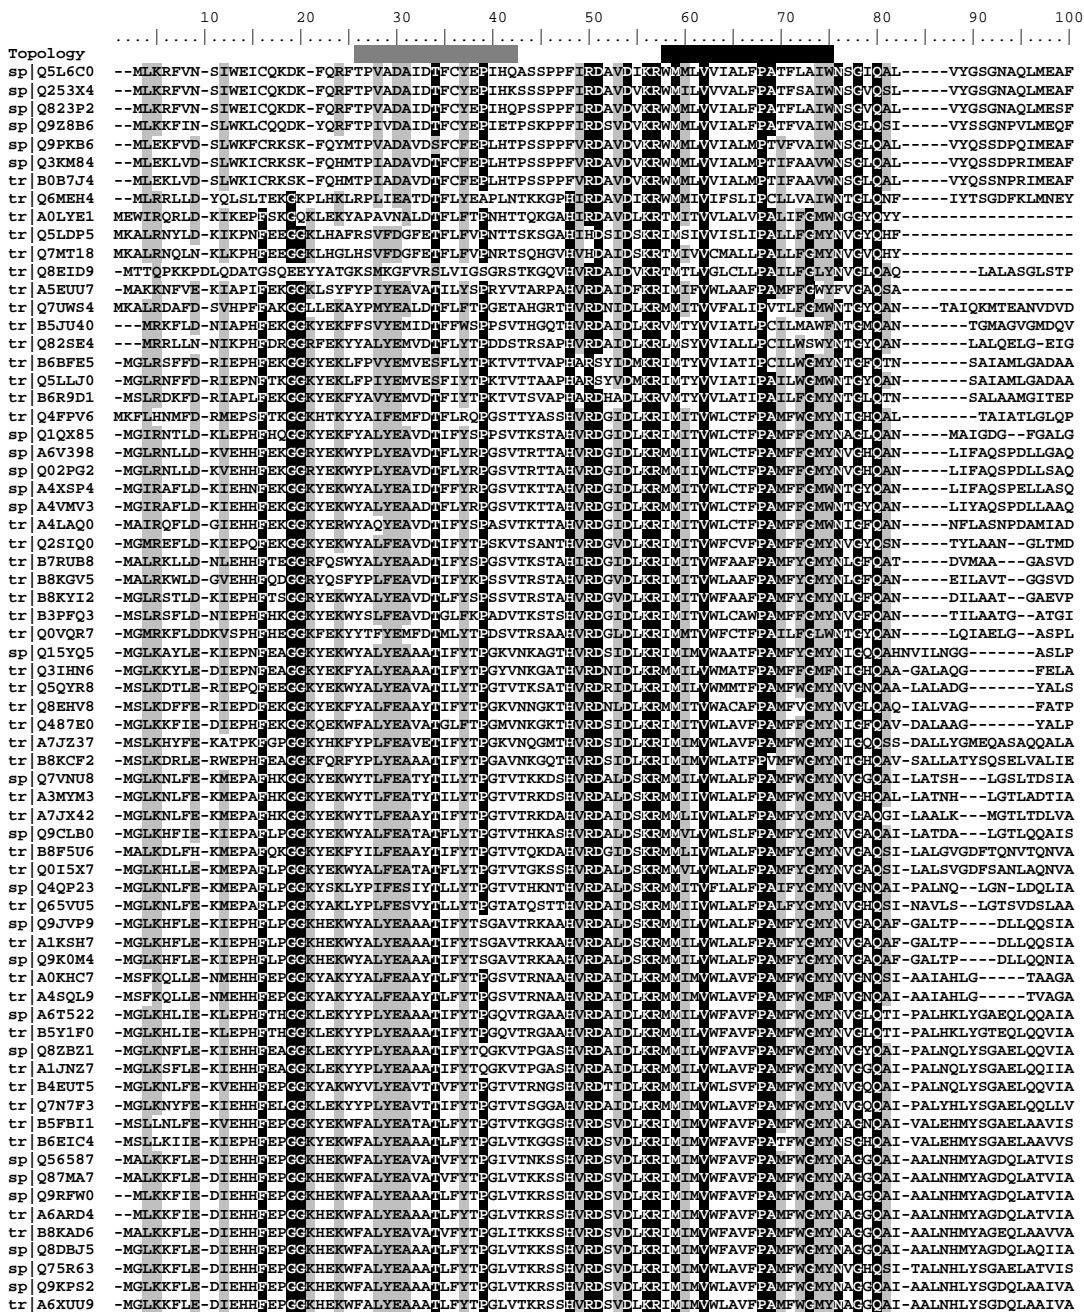

110 120 130 140 150 160 170 180 190 200  
.....|.....|.....|.....|.....|.....|.....|.....|.....|.....|  
Topology  
sp|Q5L6C0 LHISG-FRYSLSFIFN---DIGMFSVLWTCCKHFLPDLIISYVGGACVFAVTRRKHRIAEGLLVGMLYPLTPPTTFYMAALGIFAGVWSKEDF  
sp|Q253X4 LHISG-FRYSLSFIFN---DVGVFSLVWACVYKFLPDLIISYVGGACVFAVTRRKHRIAEGLLVGMLYPLTPPTTFYMAALGIFAGVWSKEDF  
sp|Q823P2 LHISG-FRYSLSFIFN---DIGVFSILMTYCKIIFLPIISYVGGVGVFAVTRRKHRIAEGLLVGMLYPLTPPTTFYMAALGIFAGVWSKEDF  
sp|Q9Z8B6 LHISG-FGSYLSFYVYK---EIHVPLILWGLKIFDPLTIISYVGGTCVFVFAVTRRKHRIAEGLLVGMLYPLTPPTTFYMAALGIFAGVWSKEDF  
sp|Q9PKB6 LHISG-FTSYFSFYVSK---EIGIASVLFACCKIFLPLIFISYAVGGTCVFVFAVTRRKHRIAEGLLVGMLYPLTPPTTFYMAALGIFAGVWSKEDF  
sp|Q3KM84 LHISG-FKSYFSFYVYQ---EIGIASVLFACCKIFLPLIFISYAVGGTCVFVFAVTRRKHRIAEGLLVGMLYPLTPPTTFYMAALGIFAGVWSKEDF  
tr|B07J74 LHISG-FKSYFSFYVYQ---EIGIASVLFACCKIFLPLIFISYAVGGTCVFVFAVTRRKHRIAEGLLVGMLYPLTPPTTFYMAALGIFAGVWSKEDF  
tr|Q6MEH4 LSGSNLSQQYIDFAFK---DMRPLTIKIKLITLPLIISYAVGGCLCFAVTRRKHRIAEGLLVGMLYPLTPPTTFYMAALGIFAGVWSKEDF  
tr|A0LYE1 -----TQLGEAFT-----FWEAIGHCKALKIENIAVSYGVLGIFFAFATFRCHEVNEGELVGTIPMINEIDIEPLMVGLVFAVWVWAKEDF  
tr|Q5LDP5 -----LTHGAQGG-----FIEMFYFGLALDLKLIIVSVVGGVGVFAVTRRKHRIAEGLLVGMLYPLTPPTTFYMAALGIFAGVWSKEDF  
tr|Q7MT18 -----MAIDAPVV-----FWPAFLFGLLAVLKLIVSYAVGLGIFFAVVAQYRKRKBTQEGELVSGGLIPMIVEVDTPLMILATATARAIFAKEDF  
tr|Q8EID9 DTWKLALFNALSGGLT---AETSIVGLFLYLCLSFYFLPYLITALLTCLFVWVFAKVHQCDEHGEFVTSALLLPLVSVLPLWLVVGLISFVWVWAKEDF  
tr|A5EUU7 -----HAA---GIERGFANLACACVHLPTYLVTFAVGGTCVFVFAVTRRKHRIAEGLLVGMLYPLTPPTTFYMAALGIFAGVWSKEDF  
tr|Q7UW54 FDWHTTHTAVGFGHD---PANHVDNFVCAITFHLPIYVTCMVEFGCHIFLPIYVTFVGGVFAVTRRKHRIAEGLLVGMLYPLTPPTTFYMAALGIFAGVWSKEDF  
tr|B5JU40 NNWRFALIGALAGQAA---AEGNLANVHFPCFLVPLPYLTTLVVGGIWFVFAVTRRKHRIAEGLLVGMLYPLTPPTTFYMAALGIFAGVWSKEDF  
tr|Q82SE4 QNRNRNLLTLNMG---F-DPQSVLSTIHLCLYELPYLITLLVGGVFAVTRRKHRIAEGLLVGMLYPLTPPTTFYMAALGIFAGVWSKEDF  
tr|B6BFE5 TGWRVAVLQALGIS---L-DASNPLANIAHFVLYFLPIYVTVLVACGFVEVFAVTRRKHRIAEGLLVGMLYPLTPPTTFYMAALGIFAGVWSKEDF  
tr|Q5LLJ0 TGWRIALLQALGIS---L-DASNPLANVAFGLYFLPYLITLLVGGIWFVFAVTRRKHRIAEGLLVGMLYPLTPPTTFYMAALGIFAGVWSKEDF  
tr|B6R9D1 AGWRAAILSLGGIG---F-NPDNFIFANMAHGALYFLPIYVTVLVGGVFAVTRRKHRIAEGLLVGMLYPLTPPTTFYMAALGIFAGVWSKEDF  
tr|Q4FPV6 EGWRTIITSMAGYNPD---SIWASFVYACMCFELPYLVTFGVGLLCEIFAVTRRKHRIAEGLLVGMLYPLTPPTTFYMAALGIFAGVWSKEDF  
sp|Q1X85 G-WREAVFTMALAGSHD---GAGLWNDFVYMAYFHPITYAVTFVGGVFAVTRRKHRIAEGLLVGMLYPLTPPTTFYMAALGIFAGVWSKEDF  
sp|A6V398 DGWRFALIGALAG-FD---PNSLWDCLVQCAAAYFLPYLVTFFVGGVFAVTRRKHRIAEGLLVGMLYPLTPPTTFYMAALGIFAGVWSKEDF  
sp|Q02PQ2 GWRFRALIGALAG-FD---PNSLWDCLVQCAAAYFLPYLVTFFVGGVFAVTRRKHRIAEGLLVGMLYPLTPPTTFYMAALGIFAGVWSKEDF  
sp|A4XSP4 EGWRFALIGSAG-FD---PNSLWDFNFIQCAAAYFLPYAVTFVGGVFAVTRRKHRIAEGLLVGMLYPLTPPTTFYMAALGIFAGVWSKEDF  
sp|A4VMV3 EGWRFALIGAFAG-FD---PNSLWDFNFIQCAAAYFLPYAVTFVGGVFAVTRRKHRIAEGLLVGMLYPLTPPTTFYMAALGIFAGVWSKEDF  
tr|A4LAQ0 GGLREAFITLALVGD---L-ESYGLMFLYCACFVFLPIYAVTFVGGVFAVTRRKHRIAEGLLVGMLYPLTPPTTFYMAALGIFAGVWSKEDF  
tr|Q2S1Q0 MDWGVILIAMLAGNDA---AS-IWDFNYGAVYFLPIYAVTFVGGVFAVTRRKHRIAEGLLVGMLYPLTPPTTFYMAALGIFAGVWSKEDF  
tr|B7RUB8 G-WHGWLIELLGG-YD---ASNLIWHCFWYACVFLPIYAVTFVGGVFAVTRRKHRIAEGLLVGMLYPLTPPTTFYMAALGIFAGVWSKEDF  
tr|B8KGV5 G-WRGSLLIAGLGG-ND---SGNIWNHMFYCALVFLPIYAVTFVGGVFAVTRRKHRIAEGLLVGMLYPLTPPTTFYMAALGIFAGVWSKEDF  
tr|B8Y12 G-WRGTIIAGLGG-YD---SGNIWDCMVFYCALVFLPIYAVTFVGGVFAVTRRKHRIAEGLLVGMLYPLTPPTTFYMAALGIFAGVWSKEDF  
tr|B3PQ3 DNWHGALALFAG-HN---PNSIWNHMFYCALVFLPIYAVTFVGGVFAVTRRKHRIAEGLLVGMLYPLTPPTTFYMAALGIFAGVWSKEDF  
tr|Q0VQR7 AGWRSDVLAALTG-FD---PASIWANVHLCAVYFLPIYAVTFVGGVFAVTRRKHRIAEGLLVGMLYPLTPPTTFYMAALGIFAGVWSKEDF  
sp|Q15YQ5 DMWQALFTLALVGD---L-ESYGLMFLYCACFVFLPIYAVTFVGGVFAVTRRKHRIAEGLLVGMLYPLTPPTTFYMAALGIFAGVWSKEDF  
tr|Q3IHN6 NITWQVDFLQGLGQLT---ADA-GWGAKMFLYCACFVFLPIYAVTFVGGVFAVTRRKHRIAEGLLVGMLYPLTPPTTFYMAALGIFAGVWSKEDF  
tr|Q5YR8 DVWQVGLPHLGGELG---ADA-GWGTKMFLYCACFVFLPIYAVTFVGGVFAVTRRKHRIAEGLLVGMLYPLTPPTTFYMAALGIFAGVWSKEDF  
tr|Q8EHV8 DVWQVGLPHLGGELG---ANS-GWPALMFLYCACFVFLPIYAVTFVGGVFAVTRRKHRIAEGLLVGMLYPLTPPTTFYMAALGIFAGVWSKEDF  
tr|Q487E0 QSQWVDFLQGLGQLT---AGS-GTFDMFLYCACFVFLPIYAVTFVGGVFAVTRRKHRIAEGLLVGMLYPLTPPTTFYMAALGIFAGVWSKEDF  
tr|A7J327 SSWQ---LSVWVGSQDA---VSGQWASQMLKCAVYFLPIYAVTFVGGVFAVTRRKHRIAEGLLVGMLYPLTPPTTFYMAALGIFAGVWSKEDF  
tr|B8KCF2 QSWR---LSVWVGSQDA---MVDSHWAMQMLKCAVYFLPIYAVTFVGGVFAVTRRKHRIAEGLLVGMLYPLTPPTTFYMAALGIFAGVWSKEDF  
sp|Q7VNU8 NNWHYAFSEAVGATLT---ADAGWGSKMLLCATVFLPIYAVTFVGGVFAVTRRKHRIAEGLLVGMLYPLTPPTTFYMAALGIFAGVWSKEDF  
tr|A3MYM3 NNWHYGFADALGATLT---ADAGWGSKMLLCATVFLPIYAVTFVGGVFAVTRRKHRIAEGLLVGMLYPLTPPTTFYMAALGIFAGVWSKEDF  
tr|A7JX42 NNWHYSLADLSGLS---V---ADAGWTKMLLCATVFLPIYAVTFVGGVFAVTRRKHRIAEGLLVGMLYPLTPPTTFYMAALGIFAGVWSKEDF  
sp|Q9CLB0 GHWQYALSHALGADLT---LSAGWASKMLLCATVFLPIYAVTFVGGVFAVTRRKHRIAEGLLVGMLYPLTPPTTFYMAALGIFAGVWSKEDF  
tr|B8F5U6 NDWHFALANAFVGLS---QDAGVFGKMLLCATVFLPIYAVTFVGGVFAVTRRKHRIAEGLLVGMLYPLTPPTTFYMAALGIFAGVWSKEDF  
tr|Q0I5X7 NDWHFALANMGLV---S---IDAGVLAGKMLLCATVFLPIYAVTFVGGVFAVTRRKHRIAEGLLVGMLYPLTPPTTFYMAALGIFAGVWSKEDF  
sp|Q4QP23 NDWHYALASLLGLDLT---ANATGWSKMLLCATVFLPIYAVTFVGGVFAVTRRKHRIAEGLLVGMLYPLTPPTTFYMAALGIFAGVWSKEDF  
tr|Q65VU5 NDWHYALASLLGLDLT---AAAGWGSKMLLCATVFLPIYAVTFVGGVFAVTRRKHRIAEGLLVGMLYPLTPPTTFYMAALGIFAGVWSKEDF  
sp|Q9JVP9 NDWHYALANALGINMS---SEAGVLGKMLFGAIVFLPIYAVTFVGGVFAVTRRKHRIAEGLLVGMLYPLTPPTTFYMAALGIFAGVWSKEDF  
tr|A1KSH7 NDWHYTLADALGINMS---SEAGVLGKMLFGAIVFLPIYAVTFVGGVFAVTRRKHRIAEGLLVGMLYPLTPPTTFYMAALGIFAGVWSKEDF  
sp|Q9KOM4 NDWHYAFANALGINMS---SEAGVSDKMLFGAIVFLPIYAVTFVGGVFAVTRRKHRIAEGLLVGMLYPLTPPTTFYMAALGIFAGVWSKEDF  
tr|A0KHC7 DTWQYTIATLLGASLD---PAVAGISKMLLCAAFELPIYAVTFVGGVFAVTRRKHRIAEGLLVGMLYPLTPPTTFYMAALGIFAGVWSKEDF  
tr|A4SQL9 DTWQYTIATLLGASLD---PAVAGISKMLLCAAFELPIYAVTFVGGVFAVTRRKHRIAEGLLVGMLYPLTPPTTFYMAALGIFAGVWSKEDF  
sp|A6T522 NNWHYSVAQWLGVFSFS---ADAGWLSMMLLCATVFLPIYAVTFVGGVFAVTRRKHRIAEGLLVGMLYPLTPPTTFYMAALGIFAGVWSKEDF  
tr|B5YLF0 NNWHYSVAQWLGVFSFS---ADAGWLSMMLLCATVFLPIYAVTFVGGVFAVTRRKHRIAEGLLVGMLYPLTPPTTFYMAALGIFAGVWSKEDF  
sp|Q8ZBZ1 GDWHYRLAQMLGASLT---PDAGWASKMLLCAAFELPIYAVTFVGGVFAVTRRKHRIAEGLLVGMLYPLTPPTTFYMAALGIFAGVWSKEDF  
tr|A1JN27 SDWHYRLAQMLGASLT---PDASVWSKMLLCAAFELPIYAVTFVGGVFAVTRRKHRIAEGLLVGMLYPLTPPTTFYMAALGIFAGVWSKEDF  
tr|B4EUT5 SDWHYRLAQMLGASLT---PDAGWGSKMLLCAAFELPIYAVTFVGGVFAVTRRKHRIAEGLLVGMLYPLTPPTTFYMAALGIFAGVWSKEDF  
tr|Q7N7F3 SDWHYCVQFLGASLT---PDAGWGSKMLLCAAFELPIYAVTFVGGVFAVTRRKHRIAEGLLVGMLYPLTPPTTFYMAALGIFAGVWSKEDF  
tr|B5FB11 GNWHYWLTEMLGGTIS---ADAGWSSMMLLCATVFLPIYAVTFVGGVFAVTRRKHRIAEGLLVGMLYPLTPPTTFYMAALGIFAGVWSKEDF  
tr|B6ETC4 GNWHYWLTEMLGGTIS---ADAGWSSMMLLCATVFLPIYAVTFVGGVFAVTRRKHRIAEGLLVGMLYPLTPPTTFYMAALGIFAGVWSKEDF  
sp|Q56587 GNWHYWLTEMLGGTIS---ADAGWGSKMLLCAAFELPIYAVTFVGGVFAVTRRKHRIAEGLLVGMLYPLTPPTTFYMAALGIFAGVWSKEDF  
sp|Q87MA7 GNWHYWLTEMLGGTIS---ADAGWGSKMLLCAAFELPIYAVTFVGGVFAVTRRKHRIAEGLLVGMLYPLTPPTTFYMAALGIFAGVWSKEDF  
sp|Q9RFW0 GNWHYWLTEMLGGTIS---ADAGWGSKMLLCAAFELPIYAVTFVGGVFAVTRRKHRIAEGLLVGMLYPLTPPTTFYMAALGIFAGVWSKEDF  
tr|A6ARD4 GNWHYWLTEMLGGTIS---ADAGWGSKMLLCAAFELPIYAVTFVGGVFAVTRRKHRIAEGLLVGMLYPLTPPTTFYMAALGIFAGVWSKEDF  
tr|B8KAD6 GNWHYWLTEMLGGTIS---ADAGWGSKMLLCAAFELPIYAVTFVGGVFAVTRRKHRIAEGLLVGMLYPLTPPTTFYMAALGIFAGVWSKEDF  
sp|Q8DBJ5 GNWHYWLTEMLGGTIS---ADAGWGSKMLLCAAFELPIYAVTFVGGVFAVTRRKHRIAEGLLVGMLYPLTPPTTFYMAALGIFAGVWSKEDF  
sp|Q75R63 GNWHYWLTEMLGGTIS---TQAGWASMMLLCATVFLPIYAVTFVGGVFAVTRRKHRIAEGLLVGMLYPLTPPTTFYMAALGIFAGVWSKEDF  
sp|Q9K9S2 GNWHYWLTEMLGGTIS---SDAGWGSKMLLCAAFELPIYAVTFVGGVFAVTRRKHRIAEGLLVGMLYPLTPPTTFYMAALGIFAGVWSKEDF  
tr|A6XUU9 GNWHYWLTEMLGGTIS---SDAGWGSKMLLCAAFELPIYAVTFVGGVFAVTRRKHRIAEGLLVGMLYPLTPPTTFYMAALGIFAGVWSKEDF

```

                210           220           230           240           250           260           270           280           290           300
          .....|.....|.....|.....|.....|.....|.....|.....|.....|.....|.....|.....|.....|.....|.....|.....|.....|.....|.....|.....|.....
Topology
sp|Q5L6C0|GGTGMMNINPALSGRAFLFFTEPAKMSGD-VVVGSNPHTHKDSLTTMNATAGKSIIDGFSQSTCQOTLNSTPPSVKRIHVDAIASNILHMTHTVPTQNVIE
sp|Q253X4|GGTGMMNINPALSGRAFLFFTEPAKMSGD-VVVGSNPMKIKESLLAMNSTAGKSIIDGFSQSTCQOTLNSTPPSVKRVHVDIAIASNILHMTHTVPTQNVIQ
sp|Q823P2|GGTGMMNINPALSGRAFLFFTEPAKMSGD-VVVGSNPTKIKESLLAMNSTAGKSIIDGFSQSTCQOTLNSTAPAVKRVHVDIAIASNILQMPHVPTESVVIH
sp|Q9Z8B6|GGTGMMNINPALSGRAFLFFTEPAKMSGD-VVVGSNPGVTKDSLMMKNSSTGKVLIDGFSQSTCQOTLNSTPPSVKRLHVDIAIASNMLHHPHVPTQDVVIH
sp|Q9PKB6|GGTGMMNINPALSGRAFLFFTEPAKMSGD-VVVGSNPSKIKESLAMNSLAERSNFDGFSQSTCQOTLNSTPPSVKRVHVDIAIASNILKLEHVPSQDVLIH
sp|Q3KM84|GGTGMMNINPALSGRAFLFFTEPAKMSGD-VVVGSNPSRIKESLATMSSLAEKSHFDGFSQSTCQOTLNSTPPSVKRVHVDIAIASNILNLEHVPTQDVLIH
tr|B0B7J4|GGTGMMNINPALSGRAFLFFTEPAKMSGD-VVVGSNPSRIKESLATMSSLAEKSHFDGFSQSTCQOTLNSTPPSVKRVHVDIAIASNILNLEHVPTQDVLIH
tr|Q6MEH4|GGTGMMNINPALSGRAFLFFTEPAKMSGD-VVVGNTPTLVRESLTKMNHDAHTGSLDGYSCQTHAFRNFTPEIKRIHVDAIASNDLGNQVHSPFPIIE
tr|A0LYE1|GGTGMMNINPALTRARAFEFAYPTKMSGDVVVSNAS-----EVAVSGEPIHSGSL
tr|Q5LDP5|GGTGMMNINVALVTRAFLEFAYPTKMSGDVVVQAQDSI-----FGLGN--TVDGLTATSTSGVA
tr|Q7MT18|GGTGRNFINPALVTRAFLEFAYPAAMSGDQVFRVTDAT-----FGLGAGTVA--VDGFSGATPISGQI
tr|Q8EID9|GGMGYNFINPALAGRAFLFFAYPSEVTIVKQLVA-----VDGFSGATPISQA
tr|A5EUU7|GGTGRNFINPALAGRAFLFFAYPTQMSGD-VVIVASVKG-----HA-----WIDGFSGATPISATI
tr|Q7UWS4|GGTGRNFINPALVTRAFLEFAYAGQISGDVWVTA-----VDGFSGATPISGM
tr|B5JU40|GGTCKNFINPALVTRAFLEFAYPAHLISGDSVWVTA-----VDGVTGATPISGLA
tr|Q82SE4|GGTCKNFINPALVTRAFLEFAYPADISGDLVVVA-----VDGYTATPISGLG
tr|B6BFE5|GGTCKNFINPALVTRAFLEFAYPAMISGDSVWVTP-----VDGFSGATPISGVT
tr|Q5LLJ0|GGTCKNFINPALVTRAFLEFAYPAMISGDSVWVTP-----VDGFSGATPISAVS
tr|B6R9D1|GGTCKNFINPALVTRAFLEFAYPAAMSGDQVFRVTDAT-----VDGFSGATPISGVA
tr|Q4FPV6|GGTCKNFINPALSGRAFLFFAYPAYMSGDVWVTA-----VDGFSGATPISGLA
sp|Q1QX85|GGTCKNFINPALVTRAFLEFAYPAQISGDVWVVA-----ADGYTATPISSTA
sp|A6V398|GGTCKNFINPALVTRAFLEFAYPAQMSGDVAVTIS-----VDGFAGATPISSLA
sp|Q02PG2|GGTCKNFINPALVTRAFLEFAYPAQMSGDVAVTIS-----VDGFAGATPISSLA
sp|A4XSP4|GGTCKNFINPALVTRAFLEFAYPAQMSGDVAVTIS-----VDGFAGATPISSLA
sp|A4VMV3|GGTCKNFINPALVTRAFLEFAYPAQMSGDVAVTIS-----VDGYAGATPISLG
tr|A4LAQ0|GGTCKNFINPALVTRAFLEFAYPAQISGDVWVTA-----VDGFSGATPISWA
tr|Q2SIQ0|GGTCKNFINPALVTRAFLEFAYPAQISGDVAVTIS-----VDGFSGATPISVA
tr|B7RUB8|GGTCKNFINPALVTRAFLEFAYPAQISGDVWVVA-----VDGYTATPISLV
tr|B8KGV5|GGTCKNFINPALVTRAFLEFAYPAQISGDVAVTIS-----VDGYSGATPISGLV
tr|B8KYI2|GGTCKNFINPALVTRAFLEFAYPADISGDLVVTA-----VDGYSGATPISGLV
tr|B3PFQ3|GGTCKNFINPALVTRAFLEFAYPAEISGDLVVTA-----VDGYTATPISVA
tr|Q0VQR7|GGTCKNFINPALVTRAFLEFAYPAQMSGDVAVTIS-----VDNFSGATPISLA
sp|Q15YQ5|GGTGRNFINPALSGRAFLFFAYPAQISGDVAVTIS-----ADGFSGATPISQA
tr|Q3IHN6|GGTGRNFINPALAGRAFLFFAYPAQISGDVWVTA-----VDGFSGATPISQA
tr|Q5QYR8|GGTGRNFINPALVTRAFLEFAYPASMSGDSVWVTA-----VDGFSGATPISGA
tr|Q8EHV8|GGTGRNFINPALAGRAFLFFAYPLNMSGDSVWV-----ADGYSGATPISQA
tr|Q487E0|GGTCKNFINPALAGRAFLFFAYPQISGDVWVVA-----ADGFSGATPISSA
tr|A7JZ37|GGTGRNFINPALAGRAFLFFAYPAMISGCAVVVA-----ADGYSGATPISQW
tr|B8KCF2|GGTGRNFINPALAGRAFLFFAYPAMISGCAVVVA-----ADGYTATPISQW
sp|Q7VNU8|GGVCKNFINPALAGRAFLFFAYPAQISGDLVVTA-----ADGFSGATPISQW
tr|A3MYM3|GGVCKNFINPALAGRAFLFFAYPAQISGDLVVTA-----ADGFSGATPISQW
tr|A7JX42|GGVCKNFINPALAGRAFLFFAYPGQISGDVWVVA-----ADGFSGATPISQW
sp|Q9CLB0|GGVCKNFINPALAGRAFLFFAYPAQISGDLVVVA-----ADGFSGATPISQW
tr|B8F5U6|GGVCKNFINPALAGRAFLFFAYPAQISGDLVVTA-----ADGFSGATPISQW
tr|Q0I5X7|GGVCKNFINPALAGRAFLFFAYPAQISGDLVVTA-----ADGFSGATPISQW
sp|Q4QP23|GGVCKNFINPALAGRAFLFFAYPAQISGDLVVTA-----ADGFSGATPISQW
tr|Q65VU5|GGVCKNFINPALAGRAFLFFAYPGQISGDLVVTA-----TDGFSGATPISQW
sp|Q9JVP9|GGTCKNFINPALAGRAFLFFAYPAMISGDLVVTA-----VDGYSGATPISQW
tr|A1KSH7|GGTCKNFINPALAGRAFLFFAYPAMISGDLVVTA-----VDGYSGATPISQW
sp|Q9KOM4|GGTCKNFINPALAGRAFLFFAYPAMISGDLVVTA-----VDGYSGATPISQW
tr|A0KHC7|GGTCKNFINPALAGRAFLFFAYPGQISGDVWVVA-----VDGYSGATPISQW
tr|A4SQI9|GGTCKNFINPALAGRAFLFFAYPGQISGDVWVVA-----VDGYSGATPISQW
sp|A6T522|GGTGRNFINPALAGRAFLFFAYPAQISGDLVVTA-----ADGFSGATPISQW
tr|B5Y1F0|GGTGRNFINPALAGRAFLFFAYPAQISGDLVVTA-----ADGFSGATPISQW
sp|Q8ZBZ1|GGTGRNFINPALAGRAFLFFAYPAQISGDLVWTS-----ADGFSGATPISQW
tr|A1JNZ7|GGTGRNFINPALAGRAFLFFAYPAQISGDLVVTA-----ADGFSGATPISQW
tr|B4EUT5|GGTGRNFINPALAGRAFLFFAYPAQISGDLVVTA-----ADGFSGATPISQW
tr|Q7N7F3|GGTGRNFINPALAGRAFLFFAYPAQISGDLVVTA-----ADGFSGATPISQW
tr|B5FB11|GGTGRNFINPALAGRAFLFFAYPAQISGDLVVTA-----ADGFSGATPISQW
tr|B6EIC4|GGTGRNFINPALAGRAFLFFAYPAQISGDLVVTA-----ADGFSGATPISQW
sp|Q56587|GGTGRNFINPALAGRAFLFFAYPAQISGDLVVTA-----ADGFSGATPISQW
sp|Q87MA7|GGTGRNFINPALAGRAFLFFAYPAQISGDLVVTA-----ADGFSGATPISQW
sp|Q9RFW0|GGTGRNFINPALAGRAFLFFAYPAQISGDLVVTA-----ADGFSGATPISQW
tr|A6ARD4|GGTGRNFINPALAGRAFLFFAYPAQISGDLVVTA-----ADGFSGATPISQW
tr|B8KAD6|GGTGRNFINPALAGRAFLFFAYPAQISGDLVVTA-----ADGFSGATPISQW
sp|Q8DBJ5|GGTGRNFINPALAGRAFLFFAYPAQISGDLVVTA-----ADGFSGATPISQW
sp|Q75R63|GGTGRNFINPALAGRAFLFFAYPAQISGDLVVTA-----ADGFSGATPISQW
sp|Q9KPS2|GGTGRNFINPALAGRAFLFFAYPAQISGDLVVTA-----ADGYSGATPISQW
tr|A6XUU9|GGTGRNFINPALAGRAFLFFAYPAQISGDLVVTA-----ADGYSGATPISQW

```

Topology

```

sp|Q5L6C0|SQFSIWTES-HPGLLLDKLTLEQLQSFVTSPLSEGGGLLLPTQFDSAYAITDVIYIGIKFSSGNLFWGNLIGSLGETSTFACLLCAVFLVITGLASWRITM
sp|Q253X4|SQFSIWTES-HPGLMLDKLTLEQLQSFVTSPLSEGGGLLLPTQFDSAYAITDVIYIGIKFSSGNLFWGNLIGSLGETSTFACLLCAIFLLVITGLASWRITM
sp|Q823P2|SQFSIWAES-HPGLMLDKLTLEQLQNFVTSPLSEGGGLLLPTQFDSAYSITDVIYIGIKFSSGNLFWGNLIGSLGETSTFACLLCAIFLLVITGLASWRITM
sp|Q9Z8B6|SQFSLWTET-HPGWVLDNLTLTQLQTFVAPVAEGGLGLLPTQFDSAYAITDVIYIGIKFSSAGNLFWGNLIGSLGETSTFACLLCAIFLLVITGLASWRITM
sp|Q9PKB6|SQFSTWAES-FPGLTVDQLSLDQLQNFVTSPTAEGGLGLLPAHFDAAYSILTDAIYIGIKFSTGNLFFGNLIGSLGETSTVACLLCAGLLLLTGLASWRITM
sp|Q3KM84|TQFATWAES-YPGLTVDQLSLDQLQNFVTSPTIEGGGLLLPAHFDSACSLTEAVYIGIKFSTGNLFFGNLIGSLGETSTVACLLCAGLLLLTGLASWRITM
tr|B0B7J4|TQFATWAES-YPGLTVDQLSLDQLQNFVTSPTIEGGGLLLPAHFDSACSLTEAVYIGIKFSTGNLFFGNLIGSLGETSTVACLLCAGLLLLTGLASWRITM
tr|Q6MEH4|KQFNQMKVEVGHQATLTQLSDQLRQFVTSPLQDGGGLGLSAGNYEDAYHFASLNYGLGHNSDWHCFCLCDLKLQGETSVFACLLCAILLIWTGVGQSWRITM
tr|A0LYE1|-----ASG-----SEVSY-----SAMNMFSEVTFGSHAEFVICILACALILLVTKVGSWRITM
tr|Q5LDP5|-----STA-----TDPNGFPA-----FSDMVTGLTFGSLGETSVTALLLCAVILLWVGLASWRITM
tr|Q7MT18|-----ATAGAKMPEIHNVAGDPS-----SLMDAFLGFTFGSLGETSTLALLLCAVILLWVGLASWRITM
tr|Q8EID9|-----AAGQLQFADYAWYSAFS-----DPNWNWFFGFTVCAIGETSTLAVLLGGLLLITRGLASWRITM
tr|A5EUU7|-----TADG-----FDVMRE-----NISWMAAFVGMNCGAIGEVSTFAVLLGGIFLLVITGLASWRITM
tr|Q7UWS4|-----ANASEDAVGLSVAQYVWG-----AEE-PITWMSAFIETIQCCVGETSALLCLVCAILLIATGHSWRITM
tr|B5JU40|-----ATGGIQAVERAEG-----FTLQQSFGLMIFGSLGETSTLACLCAAFLLFTKTIASWRITM
tr|Q82E84|-----AIGGMEAVTAGG-----YTWNNAFICLMPGSLGETSTLACLCAIFLLIYTKVASWRITM
tr|B6BFE5|-----AADGVQALAAKG-----IEWSDAFTGTTGSGFGETSTLACALGLAFLLATKIANWRITM
tr|Q5LJL0|-----AADGYQLLATNG-----ITWMDAFTGTTGSGFGETSTLACLGLAFLLMTKIANWRITM
tr|B6R9D1|-----AADGMQGLAANG-----ITWTSDFIETIQGSGFGETSTLATALGVFLVITGLASWRITM
tr|Q4FPV6|-----ALGVVPQDFVDVYGM-----AITWSDAFTGNMGGSGIEVSTLAILMCAAVLLWTRIASWRITM
sp|Q1QX85|-----AONGMSAVQQAY-----SWMDAFLGFTFGSGVGETSTLAILLCAAVLLITRIASWRITM
sp|A6V398|-----AAGGVNDLIGHG-----LTWMDAFTGHNMGSGVGETSTLAFITGAVLLLITRIASWRITM
tr|Q02PG2|-----AAGGVNDLIGHG-----LTWMDAFTGHNMGSGVGETSTLAFITGAVLLLITRIASWRITM
sp|A4XSP4|-----ASGGIENVINNG-----ITWMDAFTGTHGSLGETSTLALALGGLVLLITRIASWRITM
sp|A4VMV3|-----FAGGIENVISGG-----ITWMDAFTGTHGSLGETSTLAFITGAVLLGSKIASWRITM
tr|A4LAQ0|-----ASGGLEALEAQI-----GWMNFAVGTIQGSGVGETSTLAILLGLLILLAMKIASWRITM
tr|Q2S1Q0|-----ASGGMDALNTSI-----TWMDAFLGFTQGGSGVGETSTLAILLCAVLLVMGIASWRITM
tr|B7RUB8|-----ASDGMALQAQI-----PWMDAFTGALPFGSGVGETSTLAILLGLALLASRIASWRITM
tr|B8KGV5|-----ASEGMTALQAQY-----TWMDSFIETIQGSGVGETSTLAVMLGAILLLITKVASWRITM
tr|B8KIY2|-----AADGMGLTBAEY-----SWTQAFMGSIFGSLGETSTLAVMLGAVLLLITRIASWRITM
tr|B3P9Q3|-----AQQMDAVMNQV-----SWLDAFTGFTQGGSGVGETSTLALMLGGVILLVMGIASWRITM
tr|Q0VQR7|-----ASGSLNYAVGLTGNALTEGAAAATA-SLSWMNFTGNIQGSLGETSTLAILLCAVLLMTRIASWRITM
sp|Q15YQ5|-----AAGN-----VTDWSL-----NADWMDAFTGNIQGSGVGETSTLAILLGLFLIYMRIASWRITM
tr|Q3IHN6|-----FVG-----TLDFSN-----MELWNNAFVGTIQGSGVGETSTLAILLGLFLIYVRIASWRITM
tr|Q5QYR8|-----ALG-----EMDYGN-----TQLWMDAFTGNIQGSGVGETSTLAILLGLLALYFRIASWRITM
tr|Q8EHV8|-----AAG-----SLDYAF-----NQNWMDAFTGFTFGSGVGETSTLAILLGLVLIYTRIASWRITM
tr|Q48Y70|-----SQG-----LVDSYV-----NADWNNAFVGTFGSGVGETSTFALLLCAVILLYKIASWRITM
tr|A7J3Z7|-----YEGGQSALINMTGQ-----PISWGDFAVGNIPGSGVGETSTLALLTGLVLLFMKIASWRITM
tr|B8KCF2|-----YEAAGDGLINNIISGD-----AISWTDFAFTGSMFGSGVGETSTLALLTGLVLLFMKIASWRITM
sp|Q7VNU8|-----AQGGQIALKHAVTQ-----EITWMDAFTGNIPGSGVGETSTLMLMICAATIVFARIASWRITM
tr|A3MYM3|-----AQGGQGALKHVVITG-----EITWMDAFTGNIPGSGVGETSTLMLMICAATIVFARIASWRITM
tr|A7JX42|-----AVGGQALQHVATGE-----TITWMDAFTGNIPGSGVGETSTLMLMICAATIVFARIASWRITM
sp|Q9CBL0|-----AVGGQALQHVATGE-----PITWMDAFTGNIPGSGVGETSTLMLMICAATIVFARIASWRITM
tr|B8F5U6|-----AVGGQALQHVATGE-----TITWMDAFTGNIPGSGVGETSTLMLMICAATIVFARIASWRITM
tr|Q0I5X7|-----AAGGQALKHVVATGE-----PITWMDAFTGNIPGSGVGETSTLMLMICAATIVFARIASWRITM
tr|Q4QP23|-----SQGGQALQHTVTGA-----PITWMDAFTGNIPGSGVGETSTLAILLCAVIVFTRIASWRITM
tr|Q65VU5|-----AQGGQALQHVASGQ-----PITWMDAFTGNIPGSGVGETSTLAILLCAATIVFARIASWRITM
sp|Q9JVP9|-----AAHGADGLKNAITGQ-----TITWMDAFTGKIPGSGVGETSTLALLLCAVIVFARIASWRITM
tr|A1KSH7|-----AAHGADGLKNAITGQ-----TITWMDAFTGKIPGSGVGETSTLALLLCAVIVFARIASWRITM
tr|Q9K0M4|-----AAHGADGLKNAITGQ-----TITWMDAFTGKIPGSGVGETSTLALLLCAVIVFARIASWRITM
tr|A0KHC7|-----AQGGQALINGATGQ-----TISWMDAFTGNIPGSGVGETSTLMLMICAAMIVYMRIASWRITM
tr|A4S0L9|-----AQGGQALINGATGQ-----TISWMDAFTGNIPGSGVGETSTLMLMICAAMIVYMRIASWRITM
sp|A6T522|-----ASGGGALVNVATGV-----PVSWMDAFTGNIPGSGVGETSTLMLMIFGAILLFGRVASWRITM
tr|B5Y1F0|-----ASGGGALVNVATGI-----PVSWMDAFTGNIPGSGVGETSTLMLMIFGAILLFGRVASWRITM
sp|Q8ZBZ1|-----SVNGSHSLVNTVSGQ-----PITWMDAFTGTYFGSGVGETSTLMLMIFGAILLFGRVASWRITM
tr|A1JNZ7|-----SVNGSHSLVNTVSGQ-----PITWMDAFTGNIPGSGVGETSTLMLMIFGAILLFGRVASWRITM
tr|B4EUT5|-----SVSGQSALLNNTVQ-----PISWMDAFTGNIPGSGVGETSTLMLMIFGAILLFGRIASWRITM
tr|Q7N7F3|-----AVGGQGLVNTVITGQ-----PVTWMDAFTGNIPGSGVGETSTLMLMIFGAILLFGRIASWRITM
tr|B5FB11|-----AQGGQGLVNTITGQ-----TITWMDAFTGNIPGSGVGETSTLAILLGLMIVYMRIASWRITM
tr|B6E1C4|-----AQGGQGLVNTVITGN-----TISWMDAFTGNIPGSGVGETSTLAILLGLMIVYMRIASWRITM
sp|Q56587|-----AQGGGALVNTVITGS-----PITWMDAFTGNIPGSGVGETSTLMLMICAAMIVYMRIASWRITM
sp|Q87MA7|-----AHGSGALINNTIGA-----PITWMDAFTGNIPGSGVGETSTLMLMICAAMIVYMRIASWRITM
sp|Q9RFW0|-----AHGSGALINNTIGA-----PITWMDAFTGNIPGSGVGETSTLMLMICAAMIVYMRIASWRITM
tr|A6ARD4|-----AHGSGALINNTIGA-----PITWMDAFTGNIPGSGVGETSTLMLMICAAMIVYMRIASWRITM
tr|B8KAD6|-----AQGGGALVNTVITGA-----PITWMDAFTGNIPGSGVGETSTLMLMICAAMIVYMRIASWRITM
tr|Q8DBJ5|-----AQGGGALVNTVITGA-----PITWLDFAFTGNIPGSGVGETSTLAILLCAAMIVYMRIASWRITM
sp|Q75R63|-----AITWMDAFTGNIPGSGVGETSTLALALCAAFIVYMGIASWRITM
sp|Q9KPS2|-----AQGGGALINNTATGQ-----TITWMDAFTGNIPGSGVGETSTLMLMICAATIVYMGIASWRITM
tr|A6XUU9|-----AQGGGALINNTATGQ-----TITWMDAFTGNIPGSGVGETSTLMLMICAATIVYMGIASWRITM

```

410 420 430 440 450 460 470 480 490 500

Topology

```

sp|Q5L6C0|VSFGICAFVTAWFKIKSILVKGHWAPARFFIPAYRQLFGLGAFGLVFMATDPVSPPTMKLAKWVYGLFICFMTLIRVNDPAMPPEGVMLAAILLGN
sp|Q253X4|VSFGICAFVTAWFKIVSILVKGHWAPARFFIPAYRQLFGLGAFGLVFMATDPVSPPTMKLAKWVYGLFICFMTLIRVNDPAMPPEGVMLAAILLGN
sp|Q823P2|VSFGICAFVTAWFKIFISLIVKGHWAPARFFIPAYRQLFGLGAFGLVFMATDPVSPPTMKLAKWVYGLFICFMTLIRVNDPAMPPEGVMLAAILLGN
sp|Q9Z8B6|AAFQICAFITGWDFKFKISLIVGQNGAWAPARFFIPAYRQLFGLGAFGLVFMATDPVSPPTMKLAKWVYGLFICFMTLIRVNDPAMPPEGVMLAAILLGN
sp|Q9PKB6|LSFGLSALFFAWFKIISLAAQSGAWAPARFFIPAYRHLFCIGGLAFGLVFMATDPVSPATMKLAKWVYCAFICFGLTILIRVNDPAMPPEGVMLAAILLGN
sp|Q3KM84|LSFGLSALFFAWFKIISLITGAGAWAPARFFIPAYRHLFCIGGLAFGLVFMATDPVSPAMKLAKWLKCAFICFGLTILIRVNDPAMPPEGVMLAAILLGN
tr|B0B7J4|LSFGLSALFFAWFKIISLITGAGAWAPARFFIPAYRHLFCIGGLAFGLVFMATDPVSPAMKLAKWLKCAFICFGLTILIRVNDPAMPPEGVMLAAILLGN
tr|Q6MEH4|VGMILCAFMATLFEFGTRLLGAGGGAWNPAEFTFAYRHLFCIGGLAFGLVFMATDPVSPSRKLAKWLKCAFICFGLTILIRVNDPAMPPEGVMLAAILLGN
tr|A0LYE1|LSAFTCAALMGLIENLIPVSMGLEG-----NALTNFFWYHLHLVGGFAGCFVFMATDPVSAQTKMKWVYGLFICFGLTILIRVNDPAMPPEGVMLAAILLGN
tr|Q5LDP5|LSVFFVGAFFMGWIFNLP-----PD-----TAMAHMFWYBHLVGGFAGCFVFMATDPVTSARNEKGRWVYGLFICFGLTILIRVNDPAMPPEGVMLAAILLGN
tr|Q7MT18|LSGLVCSAMALVFNALIC-----TT-----AAMQITP-LMHLVYGGFAGCFVFMATDPVTSARNEKGRWVYGLFICFGLTILIRVNDPAMPPEGVMLAAILLGN
tr|Q8EID9|VGMILCAIATATLNLVIGSST-----NQMSMFWYHLVGGFAGCFVFMATDPVTSYTRKGRWVYGLFICFGLTILIRVNDPAMPPEGVMLAAILLGN
tr|A5EUU7|VGVLAACAATSLNLVNLVIGSDT-----NMFAMFWYHLVGGFAGCFVFMATDPVSAVNVGRYIICAFICFGLTILIRVNDPAMPPEGVMLAAILLGN
tr|Q7UWS4|AGVLAQVGTGATLNLVNLVIGSST-----NMFAMFWYHLVGGFAGCFVFMATDPVSAVNVGRYIICAFICFGLTILIRVNDPAMPPEGVMLAAILLGN
tr|B5JU40|FGVFLQVMTATLNLVNLVIGSDT-----NMFAMFWYHLVGGFAGCFVFMATDPVSAVNVGRYIICAFICFGLTILIRVNDPAMPPEGVMLAAILLGN
tr|Q82SE4|RGVFFVCMVATSEFLNLVIGSST-----NMFAMFWYHLVGGFAGCFVFMATDPVSAVNVGRYIICAFICFGLTILIRVNDPAMPPEGVMLAAILLGN
tr|B6BFE5|ACGLGMIQFSLDNLVIGSST-----NMFAMFWYHLVGGFAGCFVFMATDPVSAVNVGRYIICAFICFGLTILIRVNDPAMPPEGVMLAAILLGN
tr|Q5LJ70|VGSMAQMIQFSLDNLVIGSST-----NMFAMFWYHLVGGFAGCFVFMATDPVSAVNVGRYIICAFICFGLTILIRVNDPAMPPEGVMLAAILLGN
tr|B6R9D1|IGCLGMIQFSLDNLVIGSST-----NMFAMFWYHLVGGFAGCFVFMATDPVSAVNVGRYIICAFICFGLTILIRVNDPAMPPEGVMLAAILLGN
tr|Q4FPV6|AGCVVLIATSLVNLVNLVIGSST-----NMFAMFWYHLVGGFAGCFVFMATDPVSAVNVGRYIICAFICFGLTILIRVNDPAMPPEGVMLAAILLGN
sp|Q1QX85|LGVFLQVMTATLNLVNLVIGSST-----NMFAMFWYHLVGGFAGCFVFMATDPVSAVNVGRYIICAFICFGLTILIRVNDPAMPPEGVMLAAILLGN
sp|A6V398|AGVLMCIAMVSTLNLVNLVIGSST-----NMFAMFWYHLVGGFAGCFVFMATDPVSAVNVGRYIICAFICFGLTILIRVNDPAMPPEGVMLAAILLGN
sp|Q02PG2|AGVLMCIAMVSTLNLVNLVIGSST-----NMFAMFWYHLVGGFAGCFVFMATDPVSAVNVGRYIICAFICFGLTILIRVNDPAMPPEGVMLAAILLGN
sp|A4XSP4|SGVLMCIQGLSLDNLVNLVIGSST-----NMFAMFWYHLVGGFAGCFVFMATDPVSAVNVGRYIICAFICFGLTILIRVNDPAMPPEGVMLAAILLGN
tr|A4VMV3|TCVLMCIQGLSLDNLVNLVIGSST-----NMFAMFWYHLVGGFAGCFVFMATDPVSAVNVGRYIICAFICFGLTILIRVNDPAMPPEGVMLAAILLGN
tr|A4LAQ0|CGVLMCIQGLSLDNLVNLVIGSST-----NMFAMFWYHLVGGFAGCFVFMATDPVSAVNVGRYIICAFICFGLTILIRVNDPAMPPEGVMLAAILLGN
tr|Q2S1Q0|AGVFLQVMTATLNLVNLVIGSST-----NMFAMFWYHLVGGFAGCFVFMATDPVSAVNVGRYIICAFICFGLTILIRVNDPAMPPEGVMLAAILLGN
tr|B7RUB8|IGVFLQVMTATLNLVNLVIGSST-----NMFAMFWYHLVGGFAGCFVFMATDPVSAVNVGRYIICAFICFGLTILIRVNDPAMPPEGVMLAAILLGN
tr|B8KGV5|AGVFLQVMTATLNLVNLVIGSST-----NMFAMFWYHLVGGFAGCFVFMATDPVSAVNVGRYIICAFICFGLTILIRVNDPAMPPEGVMLAAILLGN
tr|B8KY12|ACGFLQVMTATLNLVNLVIGSST-----NMFAMFWYHLVGGFAGCFVFMATDPVSAVNVGRYIICAFICFGLTILIRVNDPAMPPEGVMLAAILLGN
tr|B3PQ3|IGVFLQVMTATLNLVNLVIGSST-----NMFAMFWYHLVGGFAGCFVFMATDPVSAVNVGRYIICAFICFGLTILIRVNDPAMPPEGVMLAAILLGN
tr|Q0VQR7|LGVFLQVMTATLNLVNLVIGSST-----NMFAMFWYHLVGGFAGCFVFMATDPVSAVNVGRYIICAFICFGLTILIRVNDPAMPPEGVMLAAILLGN
sp|Q15YQ5|IGVLLGAVFSTLNLVNLVIGSST-----NMFAMFWYHLVGGFAGCFVFMATDPVSAVNVGRYIICAFICFGLTILIRVNDPAMPPEGVMLAAILLGN
tr|Q31HN6|LGVFLQVMTATLNLVNLVIGSST-----NMFAMFWYHLVGGFAGCFVFMATDPVSAVNVGRYIICAFICFGLTILIRVNDPAMPPEGVMLAAILLGN
tr|Q5QYR8|LGVFLQVMTATLNLVNLVIGSST-----NMFAMFWYHLVGGFAGCFVFMATDPVSAVNVGRYIICAFICFGLTILIRVNDPAMPPEGVMLAAILLGN
tr|Q8EHV8|CGVLMCIATLNLVNLVNLVIGSST-----NMFAMFWYHLVGGFAGCFVFMATDPVSAVNVGRYIICAFICFGLTILIRVNDPAMPPEGVMLAAILLGN
tr|Q487E0|LGVFLQVMTATLNLVNLVIGSST-----NMFAMFWYHLVGGFAGCFVFMATDPVSAVNVGRYIICAFICFGLTILIRVNDPAMPPEGVMLAAILLGN
tr|A7JZ37|AGVFLQVMTATLNLVNLVIGSST-----NMFAMFWYHLVGGFAGCFVFMATDPVSAVNVGRYIICAFICFGLTILIRVNDPAMPPEGVMLAAILLGN
tr|B8KCF2|AGVFLQVMTATLNLVNLVIGSST-----NMFAMFWYHLVGGFAGCFVFMATDPVSAVNVGRYIICAFICFGLTILIRVNDPAMPPEGVMLAAILLGN
sp|Q7VNU8|AGVFLQVMTATLNLVNLVIGSST-----NMFAMFWYHLVGGFAGCFVFMATDPVSAVNVGRYIICAFICFGLTILIRVNDPAMPPEGVMLAAILLGN
tr|A3MYM3|AGVLMCIAMVSTLNLVNLVIGSST-----NMFAMFWYHLVGGFAGCFVFMATDPVSAVNVGRYIICAFICFGLTILIRVNDPAMPPEGVMLAAILLGN
tr|A7JX42|AGVLMCIAMVSTLNLVNLVIGSST-----NMFAMFWYHLVGGFAGCFVFMATDPVSAVNVGRYIICAFICFGLTILIRVNDPAMPPEGVMLAAILLGN
sp|Q9CLB0|AGVLMCIAMVSTLNLVNLVIGSST-----NMFAMFWYHLVGGFAGCFVFMATDPVSAVNVGRYIICAFICFGLTILIRVNDPAMPPEGVMLAAILLGN
tr|B8F5U6|AGVLMCIAMVSTLNLVNLVIGSST-----NMFAMFWYHLVGGFAGCFVFMATDPVSAVNVGRYIICAFICFGLTILIRVNDPAMPPEGVMLAAILLGN
tr|Q015X7|AGVLMCIAMVSTLNLVNLVIGSST-----NMFAMFWYHLVGGFAGCFVFMATDPVSAVNVGRYIICAFICFGLTILIRVNDPAMPPEGVMLAAILLGN
sp|Q4QP23|AGVLMCIAMVSTLNLVNLVIGSST-----NMFAMFWYHLVGGFAGCFVFMATDPVSAVNVGRYIICAFICFGLTILIRVNDPAMPPEGVMLAAILLGN
tr|Q65VU5|AGVLMCIAMVSTLNLVNLVIGSST-----NMFAMFWYHLVGGFAGCFVFMATDPVSAVNVGRYIICAFICFGLTILIRVNDPAMPPEGVMLAAILLGN
tr|Q9JVP9|AGVLMCIAMVSTLNLVNLVIGSST-----NMFAMFWYHLVGGFAGCFVFMATDPVSAVNVGRYIICAFICFGLTILIRVNDPAMPPEGVMLAAILLGN
tr|A1KSH7|AGVLMCIAMVSTLNLVNLVIGSST-----NMFAMFWYHLVGGFAGCFVFMATDPVSAVNVGRYIICAFICFGLTILIRVNDPAMPPEGVMLAAILLGN
tr|Q9K0M4|AGVLMCIAMVSTLNLVNLVIGSST-----NMFAMFWYHLVGGFAGCFVFMATDPVSAVNVGRYIICAFICFGLTILIRVNDPAMPPEGVMLAAILLGN
tr|A0KHC7|AGVLMCIAMVSTLNLVNLVIGSST-----NMFAMFWYHLVGGFAGCFVFMATDPVSAVNVGRYIICAFICFGLTILIRVNDPAMPPEGVMLAAILLGN
tr|A4SQ19|AGVLMCIAMVSTLNLVNLVIGSST-----NMFAMFWYHLVGGFAGCFVFMATDPVSAVNVGRYIICAFICFGLTILIRVNDPAMPPEGVMLAAILLGN
sp|A6T522|AGVLMCIAMVSTLNLVNLVIGSST-----NMFAMFWYHLVGGFAGCFVFMATDPVSAVNVGRYIICAFICFGLTILIRVNDPAMPPEGVMLAAILLGN
tr|B5YL10|AGVLMCIAMVSTLNLVNLVIGSST-----NMFAMFWYHLVGGFAGCFVFMATDPVSAVNVGRYIICAFICFGLTILIRVNDPAMPPEGVMLAAILLGN
tr|Q8ZBZ1|AGVLMCIAMVSTLNLVNLVIGSST-----NMFAMFWYHLVGGFAGCFVFMATDPVSAVNVGRYIICAFICFGLTILIRVNDPAMPPEGVMLAAILLGN
tr|A1JNZ7|AGVLMCIAMVSTLNLVNLVIGSST-----NMFAMFWYHLVGGFAGCFVFMATDPVSAVNVGRYIICAFICFGLTILIRVNDPAMPPEGVMLAAILLGN
tr|B4EUT5|AGVLMCIAMVSTLNLVNLVIGSST-----NMFAMFWYHLVGGFAGCFVFMATDPVSAVNVGRYIICAFICFGLTILIRVNDPAMPPEGVMLAAILLGN
tr|Q7NF73|AGVLMCIAMVSTLNLVNLVIGSST-----NMFAMFWYHLVGGFAGCFVFMATDPVSAVNVGRYIICAFICFGLTILIRVNDPAMPPEGVMLAAILLGN
tr|B5FB11|AGVLMCIAMVSTLNLVNLVIGSST-----NMFAMFWYHLVGGFAGCFVFMATDPVSAVNVGRYIICAFICFGLTILIRVNDPAMPPEGVMLAAILLGN
tr|B6ETC4|AGVLMCIAMVSTLNLVNLVIGSST-----NMFAMFWYHLVGGFAGCFVFMATDPVSAVNVGRYIICAFICFGLTILIRVNDPAMPPEGVMLAAILLGN
sp|Q56587|AGVLMCIAMVSTLNLVNLVIGSST-----NMFAMFWYHLVGGFAGCFVFMATDPVSAVNVGRYIICAFICFGLTILIRVNDPAMPPEGVMLAAILLGN
sp|Q87MA7|AGVLMCIAMVSTLNLVNLVIGSST-----NMFAMFWYHLVGGFAGCFVFMATDPVSAVNVGRYIICAFICFGLTILIRVNDPAMPPEGVMLAAILLGN
sp|Q9RFW0|AGVLMCIAMVSTLNLVNLVIGSST-----NMFAMFWYHLVGGFAGCFVFMATDPVSAVNVGRYIICAFICFGLTILIRVNDPAMPPEGVMLAAILLGN
tr|A6ARD4|AGVLMCIAMVSTLNLVNLVIGSST-----NMFAMFWYHLVGGFAGCFVFMATDPVSAVNVGRYIICAFICFGLTILIRVNDPAMPPEGVMLAAILLGN
tr|B8KAD6|AGVLMCIAMVSTLNLVNLVIGSST-----NMFAMFWYHLVGGFAGCFVFMATDPVSAVNVGRYIICAFICFGLTILIRVNDPAMPPEGVMLAAILLGN
sp|Q8DBJ5|AGVLMCIAMVSTLNLVNLVIGSST-----NMFAMFWYHLVGGFAGCFVFMATDPVSAVNVGRYIICAFICFGLTILIRVNDPAMPPEGVMLAAILLGN
sp|Q75R63|AGVLMCIAMVSTLNLVNLVIGSST-----NMFAMFWYHLVGGFAGCFVFMATDPVSAVNVGRYIICAFICFGLTILIRVNDPAMPPEGVMLAAILLGN
sp|Q9KPS2|CGVLMCIAMVSTLNLVNLVIGSST-----NMFAMFWYHLVGGFAGCFVFMATDPVSAVNVGRYIICAFICFGLTILIRVNDPAMPPEGVMLAAILLGN
tr|A6XUU9|CGVLMCIAMVSTLNLVNLVIGSST-----NMFAMFWYHLVGGFAGCFVFMATDPVSAVNVGRYIICAFICFGLTILIRVNDPAMPPEGVMLAAILLGN

```

Topology

```

.....|.....|.....|.....|.....|.....
sp|Q5L6C0|VFAPLIDYFAVRKYRRRFI-----
sp|Q253X4|VFAPLIDYFAVRKYRRRFI-----
sp|Q823P2|VFAPLIDYFAVRKYRRRFI-----
sp|Q9Z8B6|VFAPLIDYFAVRKYRRKGV-----
sp|Q9PKB6|VFAPLIDRIALKQYRORRV-----
sp|Q3KM84|VFAPLIDRIALKQYRORRFI-----
tr|B0B7J4|VFAPLIDRIALKQYRORRFI-----
tr|Q6MEH4|VFAPLIDYVYVQYERNRSLRVRVA-----
tr|A0LYE1|VFAPLIDHYVVOQANVNRERKRLKLNANPQVETA--
tr|Q5LDP5|VFAPLIDYGVVQSNIKLRERKRAIKSN-----
tr|Q7MT18|VFAPLIDYFVVDNIRKARKARMLKKS-----
tr|Q8EID9|LWAPLIDYLVARANIKRRLKRHGI-----
tr|A5EUU7|VFAPLIDYFVMNANIKRRLKVRTHV-----
tr|Q7UWS4|VFAPLIDWGVVQLNIRRRARVTA-----
tr|B5JU40|LWAPLIDNFVVOQANIKRRLMQRNG-----
tr|Q82SE4|VFAPLIDYVVIQLNIRRLRRHG-----
tr|B6BFE5|VFAPLIDYFVVOQANIKRRLRRHG-----
tr|Q5LLJ0|VFAPLIDYFVVOQANIKRRLRRHV-----
tr|B6R9D1|LFSPLIDYFVVKANITRRMKRHA-----
tr|Q4FPV6|VFAPLIDYFVVOQANIKRROTARVRVYVQAOK-----
sp|Q1QX85|LFAPLIDHFFVQANIKRREMKRDAAYSPEATNEETA
sp|A6V398|VFAPLIDHFFVQANIKRRLRANG-----
sp|Q02PG2|LFAPLIDHFFVQANIKRRLRANG-----
sp|A4XSP4|LFAPLIDHFFVQANIKRRLRANV-----
sp|A4VMV3|LCAPLIDHFFVQANIKRRLRANV-----
tr|A4LAQ0|LFAPLIDHYVVOQANIKRRLRARG-----
tr|Q2SIQ0|VFAPLIDHILVVOQANIKRRLRARG-----
tr|B7RUB8|LFAPLIDNFVVOQANIKRRLRARG-----
tr|B8KGV5|VFAPLIDHFAVQANIKRRLRARG-----
tr|B8KYI2|LFAPLIDHFAVQANIKRRLRARG-----
tr|B3PFQ3|VFAPLIDHFAVQANIKRRLRARG-----
tr|Q0VQR7|LCAPLIDHFFVQANIKRRLRRRGGEV-----
sp|Q15YQ5|LWAPLIDYFVVOQANIKRRLRARG-----
tr|Q3IHN6|LFAPLIDHFFVQANIKRRLRARG-----
tr|Q5QYR8|VFAPLIDHFAVQANIKRRLRARG-----
tr|Q8EHV8|VFAPLIDHFAVQANIKRRLRARG-----
tr|Q487E0|LFAPLIDHFFVQANIKRRLRANV-----
tr|A7JZ37|LFAPLIDYLVKESNIRKREMKRARPS-----
tr|B8KCF2|LFAPLIDHILVKECNIRKRRNRKIKRQA-----
sp|Q7VNU8|LFAPLIDYLVVQSNIKRRLKAKAA-----
tr|A3MYM3|LFAPLIDYLVVQGNIKRRLKAKAA-----
tr|A7JX42|LFAPLIDYLVVQGNIKRRLRANVANG-----
sp|Q9CLB0|LFAPLIDYLVVQANIKRRLRANV-----
tr|B8F5U6|LFAPLIDYLVVQANIKRRLRANG-----
tr|Q0I5X7|LFAPLIDYLVVQANIKRRLRANG-----
sp|Q4QP23|LFAPLIDYLVVQANIKRRLRANG-----
tr|Q65VU5|LFAPLIDYLVVQANIKRRLRANG-----
sp|Q9JVP9|LFAPLIDYLVVQANIKRRLRANG-----
tr|A1KSH7|LFAPLIDYLVVQANIKRRLRANG-----
sp|Q9K0M4|LFAPLIDYLVVQANIKRRLRANG-----
tr|A0KHC7|LFAPLIDHFAVQANIKRRLRANG-----
tr|A4SQL9|LFAPLIDHFAVQANIKRRLRANG-----
sp|A6T522|LFAPLIDYLVVQANIKRRLRANG-----
tr|B5Y1F0|LFAPLIDYLVVQANIKRRLRANG-----
sp|Q8ZBZ1|LFAPLIDYLVVQANIKRRLRANG-----
tr|A1JNZ7|LFAPLIDYLVVQANIKRRLRANG-----
tr|B4EUT5|LFAPLIDYLVVQANIKRRLRANG-----
tr|Q7N7F3|LFAPLIDYLVVQANIKRRLRANG-----
tr|B5FB11|LFAPLIDHILVVECNIRKRLKRYGK-----
tr|B6EIC4|LFAPLIDHILVVECNIRKRLKRYGK-----
sp|Q56587|LFAPLIDHVVIEKNIRKRLRANG-----
sp|Q87MA7|LFAPLIDHVVIEKNIRKRLRANG-----
sp|Q9RFW0|LFAPLIDHVVIEKNIRKRLRANG-----
tr|A6ARD4|LFAPLIDHVVIEKNIRKRLRANG-----
tr|B8KAD6|LFAPLIDHVVIEKNIRKRLRANG-----
sp|Q8DBJ5|LFAPLIDHILVVECNIRKRLRANG-----
sp|Q75R63|LFAPLIDHILVIEKNIRKRLRANG-----
sp|Q9KPS2|LFAPLIDHVVIEKNIRKRLRANG-----
tr|A6XUU9|LFAPLIDHVVIEKNIRKRLRANG-----

```

**Fig. S2.** Consensus membrane topology prediction of NqrB. **(A)** Graphical representation of results from individual topology prediction algorithms (see Material and Methods). Regions classified as transmembrane helices (TMH) are indicated as black bars, regions classified as low probability TMHs or aliphatic helices are indicated as striped bars. Hydrophilic loops are represented by dashed lines or, if the prediction algorithm distinguishes between cytosolic and periplasmic loops with solid black and grey lines, respectively. **(B)** A histogram from the individual prediction results from (A) was constructed by scoring an NqrB residue from a predicted TMH region by a value of 1 and a residue from a low probability TMH or an aliphatic helix by a value of 0.5. The solid line at a score of 7.33, which is  $2/3$  of the maximal score, represents the cut-off for defining a TMH in the consensus topology prediction. Three larger regions of the histogram show intermediate scores (between 3 and 7) and were considered as hydrophobic stretches. **(C)** Comparison of 1) the consensus topology prediction derived from (B) with 2) the topology model proposed by Duffy *et al.* (4). TMHs and hydrophobic stretches are indicated by black and grey bars, respectively. Results from PhoA fusion analyses reported in (4) are indicated by black and grey triangles for cytosolic and periplasmic PhoA localization, respectively. The asterisk indicates Thr236 with its covalently attached FMN. The arrow indicates Gly141, which was proposed to interact with the inhibitor korormicin (5).

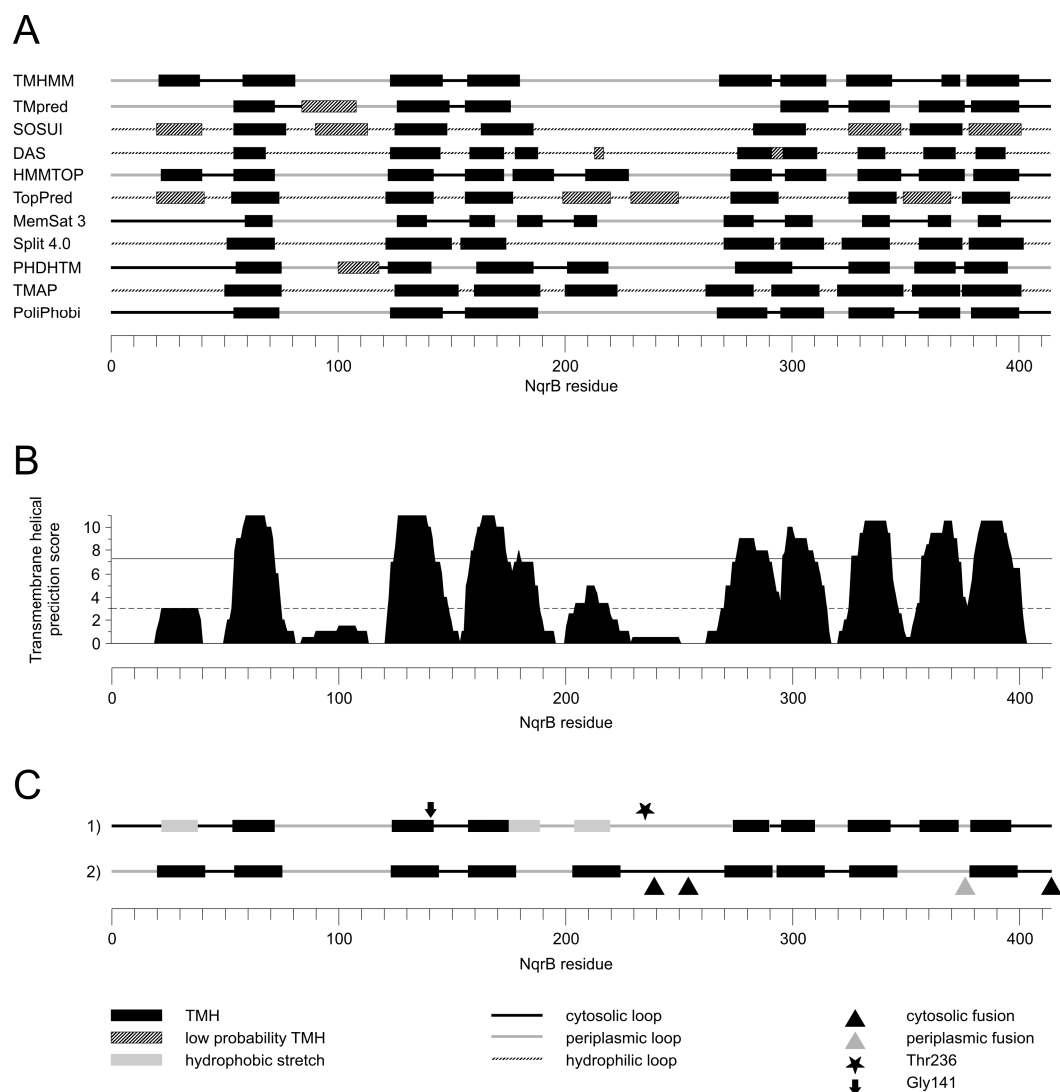

**Tab. S1.**  $\pi$ -stacking interaction of aromatic amino acid residues in riboflavin-containing proteins to riboflavin

| Protein                                   | Source                           | $\pi$ -stacking interaction  | PDB code | REF  |
|-------------------------------------------|----------------------------------|------------------------------|----------|------|
| <b>redox enzyme:</b>                      |                                  |                              |          |      |
| flavodoxin                                | <i>Desulfovibrio vulgaris</i>    | Y97                          | 1BU5     | (6)  |
| <b>riboflavin pathway:</b>                |                                  |                              |          |      |
| 6,7-Dimethyl-8-ribityllumazine synthase   | <i>Schizosaccharomyces pombe</i> | H94                          | 2A58     | (7)  |
| FAD synthetase                            | <i>Thermotoga maritima</i>       | no stacking                  | 1T6Z     | (8)  |
| riboflavin kinase                         | <i>Homo sapiens</i>              | no stacking                  | 1NB9     | (9)  |
| riboflavin synthase                       | <i>Escherichia coli</i>          | no stacking                  | 1HZE     | (10) |
| <b>riboflavin storage/homeostasis:</b>    |                                  |                              |          |      |
| riboflavin binding protein                | chicken                          | Y57, W156                    | ---      | (11) |
| dodecin                                   | <i>Halobacterium salinarum</i>   | W35, riboflavin <sup>b</sup> | 1MOG     | (12) |
| original yellow antibody                  | <i>H. sapiens</i>                | Y33, F59, Y105               | 2FL5     | (13) |
| <b>other function:</b>                    |                                  |                              |          |      |
| liver glycogen phosphorylase <sup>c</sup> | <i>H. sapiens</i>                | Y614, F286                   | 1L5R     | (14) |
| lumazine protein                          | <i>Photobacterium leiognathi</i> | no stacking                  | 3DDY     | (15) |

<sup>a</sup> Native cofactor for flavodoxin is FMN (16).

<sup>b</sup> Dodecin is a small dodecameric flavoprotein that contains two flavins stacked between two tryptophan residues to form an aromatic tetrad.

<sup>c</sup> Riboflavin is an inhibitor of the liver glycogen phosphorylase a.

## References

- Thompson, J. D., Higgins, D. G., and Gibson, T. J. (1994) *Nucleic Acids Res.* **22**, 4673-4680
- Hall, T. A. (1999) *Nucleic Acids Symp. Ser.* **41**, 95-98
- Henikoff, S., and Henikoff, J. G. (1992) *Proc. Natl. Acad. Sci. U. S. A.* **89**, 10915-10919
- Duffy, E. B., and Barquera, B. (2006) *J. Bacteriol.* **188**, 8343-8351
- Hayashi, M., Shibata, N., Nakayama, Y., Yoshikawa, K., and Unemoto, T. (2002) *Arch. Biochem. Biophys.* **401**, 173-177
- Walsh, M. A., McCarthy, A., O'Farrell, P. A., McArdle, P., Cunningham, P. D., Mayhew, S. G., and Higgins, T. M. (1998) *Eur. J. Biochem.* **258**, 362-371
- Koch, M., Breithaupt, C., Gerhardt, S., Haase, I., Weber, S., Cushman, M., Huber, R., Bacher, A., and Fischer, M. (2004) *Eur. J. Biochem.* **271**, 3208-3214
- Shin, D. H., Wang, W., Kim, R., Yokota, H., and Kim, S.-H. (2004) *Structure deposited in RCSB PDB under 1T6Z.*
- Karthikeyan, S., Zhou, Q., Mseeh, F., Grishin, N. V., Osterman, A. L., and Zhang, H. (2003) *Structure* **11**, 265-273
- Truffault, V., Coles, M., Diercks, T., Abelmann, K., Eberhardt, S., Luttgen, H., Bacher, A., and Kessler, H. (2001) *J. Mol. Biol.* **309**, 949-960
- Monaco, H. L. (1997) *EMBO J.* **16**, 1475-1483
- Bieger, B., Essen, L. O., and Oesterhelt, D. (2003) *Structure* **11**, 375-385
- Zhu, X., Wentworth, P., Jr., Kyle, R. A., Lerner, R. A., and Wilson, I. A. (2006) *Proc. Natl. Acad. Sci. U. S. A.* **103**, 3581-3585
- Ekstrom, J. L., Pauly, T. A., Carty, M. D., Soeller, W. C., Culp, J., Danley, D. E., Hoover, D. J., Treadway, J. L., Gibbs, E. M., Fletterick, R. J., Day, Y. S., Myszka, D. G., and Rath, V. L. (2002) *Chem. Biol.* **9**, 915-924
- Chatwell, L., Illarionova, V., Illarionov, B., Eisenreich, E., Huber, R., Skerra, A., Bacher, A., and Fischer, M. (2008) *structure deposited in RCSB PDB under 3DDY.*
- Pueyo, J. J., Curley, P. G., and Mayhew, S. G. (1996) *Biochem. J.* **313**, 855-861
